# Supplementary material
Source: PubMed Central journal article supplement (PMC341848)

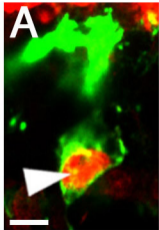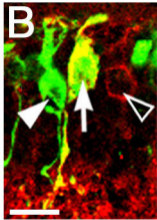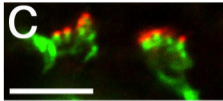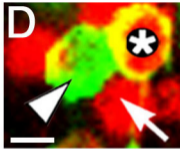

Supplement: pnas_0306520101_11.pdf [file pnas_0306520101_11.pdf]

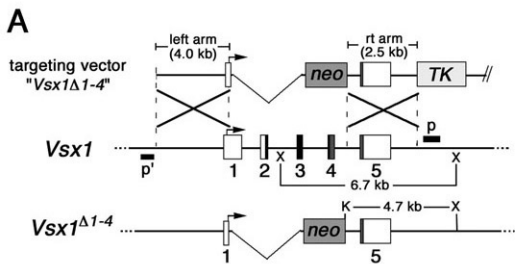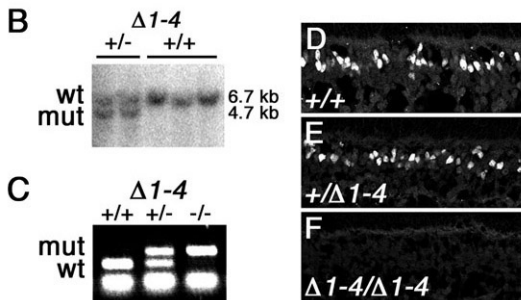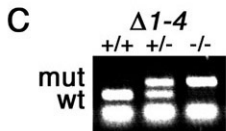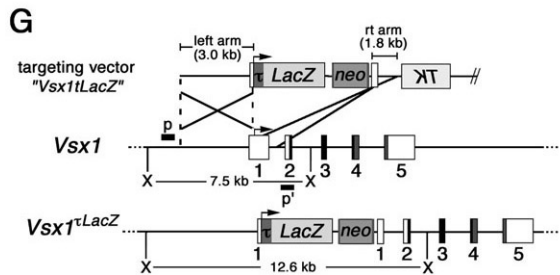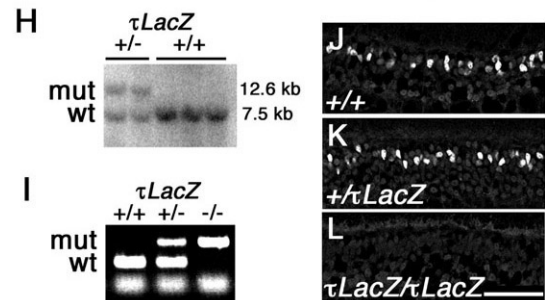

Supplement: pnas_0306520101_3.pdf [file pnas_0306520101_3.pdf]

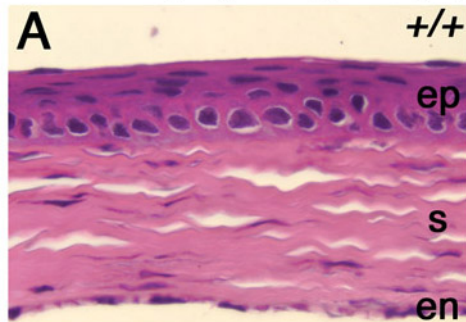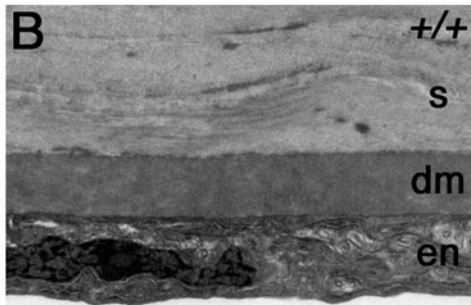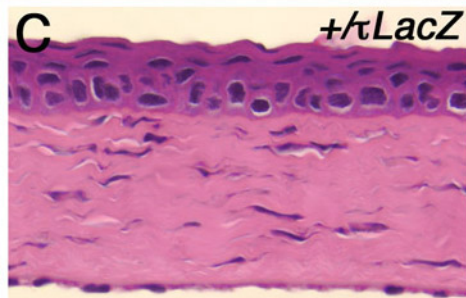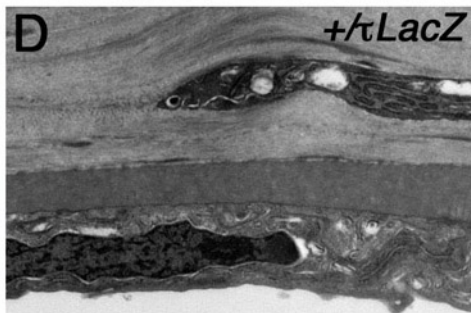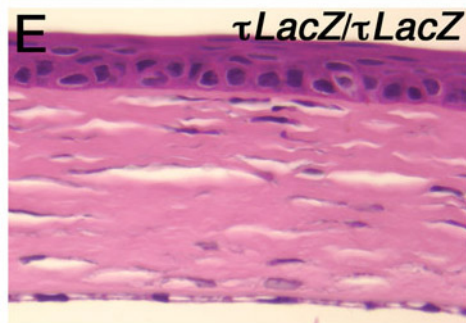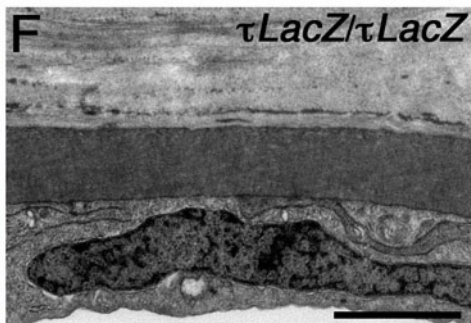

Supplement: pnas_0306520101_5.pdf [file pnas_0306520101_5.pdf]

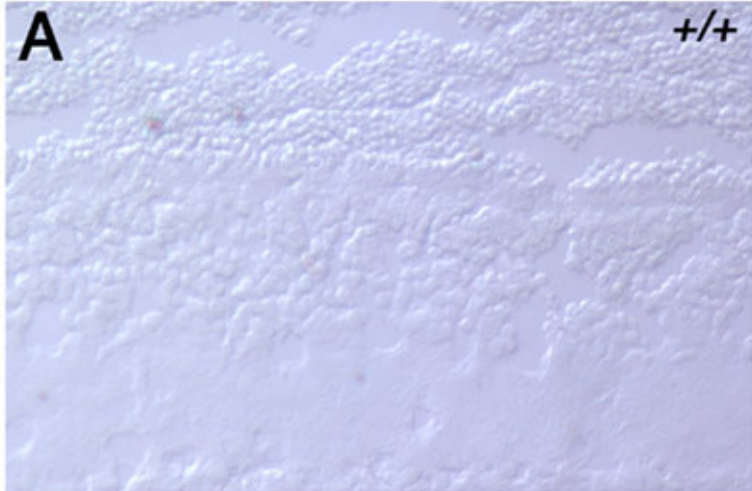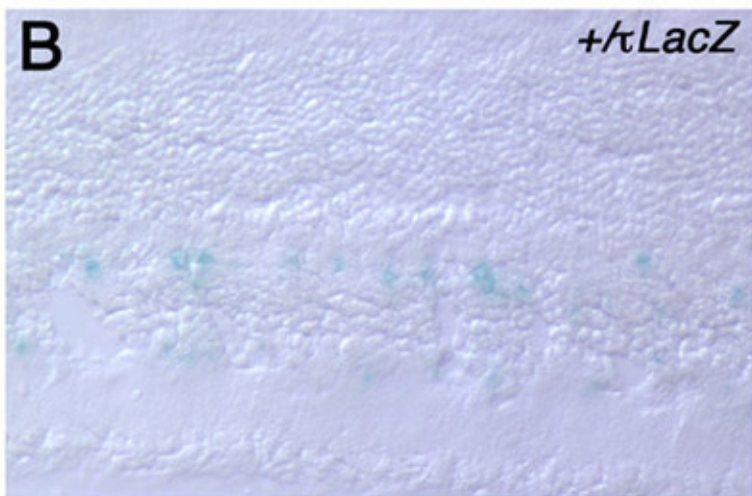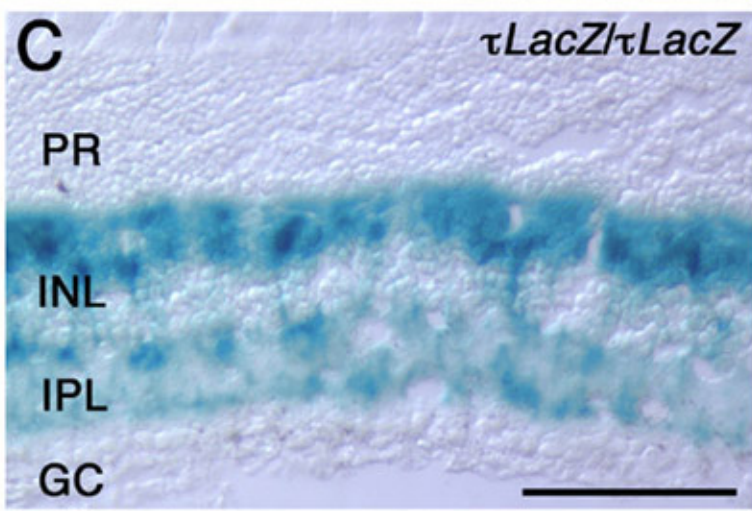

Supplement: pnas_0306520101_7.pdf [file pnas_0306520101_7.pdf]

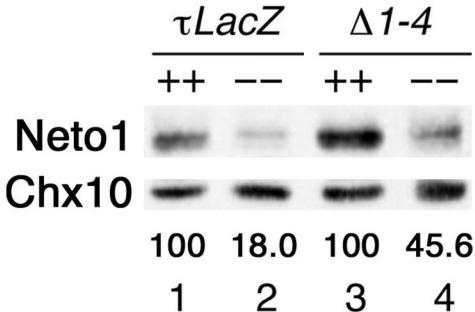

Supplement: pnas_0306520101_9.pdf [file pnas_0306520101_9.pdf]
